# Supplementary material for: Comparison of Replication-Competent, First Generation, and Helper-Dependent Adenoviral Vaccines
Source: PubMed Central journal article supplement (PMC2659436; doi:10.1371/journal.pone.0005059), 2009-03-31
Supplement: pone.0005059.s001.pdf [file pone.0005059.s001.pdf]

# Supplemental Table 1.

Two-way analysis of variance for anti-Env Sera antibodies induced by immunization with HD-Env vectors

## Day 28

|         |         |         |         |         |         |         |         |         |
|---------|---------|---------|---------|---------|---------|---------|---------|---------|
| 1/2/5/6 | -       |         |         |         |         |         |         |         |
| 2/1/6/5 | > 0.05  | -       |         |         |         |         |         |         |
| 5/6/1/2 | > 0.05  | > 0.05  | -       |         |         |         |         |         |
| 6/5/2/1 | > 0.05  | > 0.05  | > 0.05  | -       |         |         |         |         |
| 1/1/1/1 | > 0.05  | > 0.05  | > 0.05  | > 0.05  | -       |         |         |         |
| 2/2/2/2 | > 0.05  | > 0.05  | > 0.05  | > 0.05  | > 0.05  | -       |         |         |
| 5/5/5/5 | > 0.05  | > 0.05  | > 0.05  | > 0.05  | > 0.05  | > 0.05  | -       |         |
| 6/6/6/6 | > 0.05  | > 0.05  | > 0.05  | > 0.05  | > 0.05  | > 0.05  | > 0.05  | -       |
|         | 1/2/5/6 | 2/1/6/5 | 5/6/1/2 | 6/5/2/1 | 1/1/1/1 | 2/2/2/2 | 5/5/5/5 | 6/6/6/6 |

## Day 62

|         |         |         |         |         |         |         |         |         |
|---------|---------|---------|---------|---------|---------|---------|---------|---------|
| 1/2/5/6 | -       |         |         |         |         |         |         |         |
| 2/1/6/5 | > 0.05  | -       |         |         |         |         |         |         |
| 5/6/1/2 | > 0.05  | > 0.05  | -       |         |         |         |         |         |
| 6/5/2/1 | > 0.05  | > 0.05  | > 0.05  | -       |         |         |         |         |
| 1/1/1/1 | < 0.05  | < 0.01  | < 0.05  | > 0.05  | -       |         |         |         |
| 2/2/2/2 | < 0.001 | < 0.001 | < 0.001 | < 0.001 | > 0.05  | -       |         |         |
| 5/5/5/5 | < 0.001 | < 0.001 | < 0.001 | < 0.001 | > 0.05  | > 0.05  | -       |         |
| 6/6/6/6 | < 0.001 | < 0.001 | < 0.001 | < 0.001 | < 0.01  | > 0.05  | > 0.05  | -       |
|         | 1/2/5/6 | 2/1/6/5 | 5/6/1/2 | 6/5/2/1 | 1/1/1/1 | 2/2/2/2 | 5/5/5/5 | 6/6/6/6 |

## Day 103

|         |         |         |         |         |         |         |         |         |
|---------|---------|---------|---------|---------|---------|---------|---------|---------|
| 1/2/5/6 | -       |         |         |         |         |         |         |         |
| 2/1/6/5 | > 0.05  | -       |         |         |         |         |         |         |
| 5/6/1/2 | > 0.05  | > 0.05  | -       |         |         |         |         |         |
| 6/5/2/1 | > 0.05  | > 0.05  | > 0.05  | -       |         |         |         |         |
| 1/1/1/1 | < 0.001 | < 0.001 | < 0.001 | < 0.05  | -       |         |         |         |
| 2/2/2/2 | < 0.001 | < 0.001 | < 0.001 | < 0.001 | > 0.05  | -       |         |         |
| 5/5/5/5 | < 0.001 | < 0.001 | < 0.001 | < 0.001 | > 0.05  | > 0.05  | -       |         |
| 6/6/6/6 | < 0.001 | < 0.001 | < 0.001 | < 0.001 | < 0.001 | > 0.05  | > 0.05  | -       |
|         | 1/2/5/6 | 2/1/6/5 | 5/6/1/2 | 6/5/2/1 | 1/1/1/1 | 2/2/2/2 | 5/5/5/5 | 6/6/6/6 |

## Day 125

|         |         |         |         |         |         |         |         |         |
|---------|---------|---------|---------|---------|---------|---------|---------|---------|
| 1/2/5/6 | -       |         |         |         |         |         |         |         |
| 2/1/6/5 | > 0.05  | -       |         |         |         |         |         |         |
| 5/6/1/2 | > 0.05  | > 0.05  | -       |         |         |         |         |         |
| 6/5/2/1 | > 0.05  | < 0.01  | > 0.05  | -       |         |         |         |         |
| 1/1/1/1 | < 0.01  | < 0.001 | < 0.001 | < 0.05  | -       |         |         |         |
| 2/2/2/2 | < 0.001 | < 0.001 | < 0.001 | < 0.05  | > 0.05  | -       |         |         |
| 5/5/5/5 | < 0.01  | < 0.01  | < 0.001 | > 0.05  | > 0.05  | > 0.05  | -       |         |
| 6/6/6/6 | < 0.001 | < 0.001 | < 0.001 | < 0.001 | > 0.05  | > 0.05  | > 0.05  | -       |
|         | 1/2/5/6 | 2/1/6/5 | 5/6/1/2 | 6/5/2/1 | 1/1/1/1 | 2/2/2/2 | 5/5/5/5 | 6/6/6/6 |
