# Supplementary material for: Comparison of Replication-Competent, First Generation, and Helper-Dependent Adenoviral Vaccines
Source: PubMed Central journal article supplement (PMC2659436; doi:10.1371/journal.pone.0005059), 2009-03-31
Supplement: pone.0005059.s002.pdf [file pone.0005059.s002.pdf]

## Supplemental Table 2.

Two-way analysis of variance for anti-Env CTL responses induced by immunization with HD-Env vectors

|         |         | Prime   |         |         |         |         |         |         |  |
|---------|---------|---------|---------|---------|---------|---------|---------|---------|--|
| 1/2/5/6 | -       |         |         |         |         |         |         |         |  |
| 2/1/6/5 | > 0.05  | -       |         |         |         |         |         |         |  |
| 5/6/1/2 | > 0.05  | > 0.05  | -       |         |         |         |         |         |  |
| 6/5/2/1 | > 0.05  | > 0.05  | > 0.05  | -       |         |         |         |         |  |
| 1/1/1/1 | > 0.05  | > 0.05  | > 0.05  | > 0.05  | -       |         |         |         |  |
| 2/2/2/2 | > 0.05  | > 0.05  | > 0.05  | > 0.05  | > 0.05  | -       |         |         |  |
| 5/5/5/5 | > 0.05  | > 0.05  | > 0.05  | > 0.05  | > 0.05  | > 0.05  | -       |         |  |
| 6/6/6/6 | > 0.05  | > 0.05  | > 0.05  | > 0.05  | > 0.05  | > 0.05  | > 0.05  | -       |  |
|         | 1/2/5/6 | 2/1/6/5 | 5/6/1/2 | 6/5/2/1 | 1/1/1/1 | 2/2/2/2 | 5/5/5/5 | 6/6/6/6 |  |

|         |         | Boost 1 |         |         |         |         |         |         |  |
|---------|---------|---------|---------|---------|---------|---------|---------|---------|--|
| 1/2/5/6 | -       |         |         |         |         |         |         |         |  |
| 2/1/6/5 | ND      | -       |         |         |         |         |         |         |  |
| 5/6/1/2 | ND      | ND      | -       |         |         |         |         |         |  |
| 6/5/2/1 | ND      | ND      | ND      | -       |         |         |         |         |  |
| 1/1/1/1 | ND      | ND      | ND      | ND      | -       |         |         |         |  |
| 2/2/2/2 | ND      | ND      | ND      | ND      | ND      | -       |         |         |  |
| 5/5/5/5 | ND      | ND      | ND      | ND      | ND      | ND      | -       |         |  |
| 6/6/6/6 | ND      | ND      | ND      | ND      | ND      | ND      | ND      | -       |  |
|         | 1/2/5/6 | 2/1/6/5 | 5/6/1/2 | 6/5/2/1 | 1/1/1/1 | 2/2/2/2 | 5/5/5/5 | 6/6/6/6 |  |

|         |         | Boost 2 |         |         |         |         |         |         |  |
|---------|---------|---------|---------|---------|---------|---------|---------|---------|--|
| 1/2/5/6 | -       |         |         |         |         |         |         |         |  |
| 2/1/6/5 | > 0.05  | -       |         |         |         |         |         |         |  |
| 5/6/1/2 | > 0.05  | > 0.05  | -       |         |         |         |         |         |  |
| 6/5/2/1 | > 0.05  | > 0.05  | > 0.05  | -       |         |         |         |         |  |
| 1/1/1/1 | < 0.001 | < 0.001 | < 0.001 | < 0.001 | -       |         |         |         |  |
| 2/2/2/2 | < 0.001 | < 0.001 | < 0.001 | < 0.001 | > 0.05  | -       |         |         |  |
| 5/5/5/5 | < 0.001 | < 0.001 | < 0.001 | < 0.001 | > 0.05  | > 0.05  | -       |         |  |
| 6/6/6/6 | < 0.001 | < 0.001 | < 0.001 | < 0.001 | > 0.05  | > 0.05  | > 0.05  | -       |  |
|         | 1/2/5/6 | 2/1/6/5 | 5/6/1/2 | 6/5/2/1 | 1/1/1/1 | 2/2/2/2 | 5/5/5/5 | 6/6/6/6 |  |

|         |         | Boost 3 |         |         |         |         |         |         |  |
|---------|---------|---------|---------|---------|---------|---------|---------|---------|--|
| 1/2/5/6 | -       |         |         |         |         |         |         |         |  |
| 2/1/6/5 | < 0.001 | -       |         |         |         |         |         |         |  |
| 5/6/1/2 | < 0.001 | > 0.05  | -       |         |         |         |         |         |  |
| 6/5/2/1 | > 0.05  | < 0.05  | < 0.001 | -       |         |         |         |         |  |
| 1/1/1/1 | > 0.05  | > 0.05  | < 0.01  | > 0.05  | -       |         |         |         |  |
| 2/2/2/2 | < 0.001 | < 0.001 | < 0.001 | > 0.05  | > 0.05  | -       |         |         |  |
| 5/5/5/5 | > 0.05  | < 0.001 | < 0.001 | > 0.05  | < 0.05  | > 0.05  | -       |         |  |
| 6/6/6/6 | > 0.05  | < 0.001 | < 0.001 | < 0.01  | < 0.001 | > 0.05  | > 0.05  | -       |  |
|         | 1/2/5/6 | 2/1/6/5 | 5/6/1/2 | 6/5/2/1 | 1/1/1/1 | 2/2/2/2 | 5/5/5/5 | 6/6/6/6 |  |

ND = not determined
